# Supplementary material for: Clinical Characteristics, Management, and Outcomes of Patients with Cervicofacial Necrotizing Fasciitis in Nigeria: A 5-year multicentre, retrospective, cohort study
Source: Research Square preprint supplement (doi:10.21203/rs.3.rs-8148361/v1), 2025-12-11
Supplement: Supplementary file 1 [file 710d9bb97ab0ac2f75dc150d.docx]

**Supplemental Table 1: Clinical Presentation of Patients**

| **Variable** | **Category** | **Frequency** | **Percent (%)** |
| --- | --- | --- | --- |
| **Extent of Spread** | Sublingual | 20 | 16.0 |
|  | Lateral Neck | 3 | 2.4 |
|  | Anterior Chest | 36 | 28.8 |
|  | Submasseteric | 6 | 4.8 |
|  | Canine | 4 | 3.2 |
|  | Supraclavicular | 1 | 0.8 |
|  | Pterygomandibular | 1 | 0.8 |
|  | Upper Neck | 1 | 0.8 |
|  | Infratemporal | 1 | 0.8 |
|  | Massenteric | 1 | 0.8 |
|  | Anterior Mediastinum | 1 | 0.8 |
|  | Parotid | 1 | 0.8 |
|  | Cranium | 1 | 0.8 |
|  | Temporal | 5 | 4.0 |
|  | Anterior Neck | 20 | 16.0 |
|  | Face | 9 | 7.2 |
|  | Buccal | 17 | 13.6 |
|  | Submental | 44 | 35.2 |
|  | Submandibular | 73 | 58.4 |
|  | Neck | 54 | 43.2 |
| **Most Frequently Involved Tooth** | 38 | 16 | 13.6 |
|  | 36 | 15 | 12.7 |
|  | 46 | 13 | 11.0 |
|  | 48 | 13 | 11.0 |
|  | 37 | 11 | 9.3 |
|  | 47 | 8 | 6.8 |
|  | 18 | 4 | 3.4 |
|  | 16 | 3 | 2.5 |
|  | 19 | 2 | 1.7 |
|  | 25 | 2 | 1.7 |
|  | 35 | 2 | 1.7 |
|  | 15 | 2 | 1.7 |
|  | 32 | 1 | 0.8 |
|  | 24 | 1 | 0.8 |
|  | 44 | 1 | 0.8 |
| **Overlying Skin Discoloration** | Absent | 6 | 5.6 |
|  | Dark | 14 | 13.0 |
|  | Dusky Red | 14 | 13.0 |
|  | Erythematous | 6 | 5.6 |
|  | Necrosis | 32 | 29.6 |
|  | Yes | 36 | 33.3 |
| **History of Self-Medication/Traditional Remedies** | Both | 15 | 12.7 |
|  | Herbal Concoction | 11 | 9.3 |
|  | No | 23 | 19.5 |
|  | Self Medication | 69 | 58.5 |
| **Area of Necrosis** | Mastoid | 1 | 0.8 |
|  | Periorbital | 2 | 1.6 |
|  | Supraclavicular | 1 | 0.8 |
|  | Mandible | 1 | 0.8 |
|  | Cranium | 1 | 0.8 |
|  | Clavicular | 1 | 0.8 |
|  | Parotid | 2 | 1.6 |
|  | Cheek | 5 | 4.1 |
|  | Mediastinum | 3 | 2.5 |
|  | Pterygomandibular | 2 | 1.6 |
|  | Buccal | 5 | 4.1 |
|  | Face | 10 | 8.2 |
|  | Lateral Neck | 3 | 2.5 |
|  | Submental | 15 | 12.3 |
|  | Submandibular | 41 | 33.6 |
|  | Upper Neck | 13 | 10.7 |
|  | Neck | 40 | 32.8 |
|  | Upper Chest | 12 | 9.8 |
|  | Anterior Chest | 43 | 35.2 |
|  | Anterior Neck | 45 | 36.9 |
| **Co-morbidity** | None | 81 | 60.4 |
|  | Diabetes Mellitus | 22 | 16.4 |
|  | Hypertension | 16 | 11.9 |
|  | HIV | 4 | 3.0 |
|  | Hepatitis | 2 | 1.5 |
|  | CKD | 2 | 1.5 |
|  | Malnutrition | 2 | 1.5 |
|  | Others* | 5 | 3.7 |
| **Microbial Isolate** | Fusobacterium spp | 2 | 1.5 |
|  | Pervotella spp | 1 | 0.8 |
|  | Proteus mirabilis | 1 | 0.8 |
|  | Coliform | 2 | 1.5 |
|  | Bacteroides | 2 | 1.5 |
|  | E. coli | 3 | 2.3 |
|  | Klebsiella | 7 | 5.3 |
|  | Gram Negative Rods | 32 | 24.1 |
|  | Gram Positive Cocci | 21 | 15.8 |
|  | Strep spp | 13 | 9.8 |
|  | Staph spp | 15 | 11.3 |
|  | No culture | 34 | 25.6 |

*Others include thrombocytopenia, neutrophilia, AKI, platelet clumping, PUD, obesity, CCF, anemia

**Supplemental Table 2A: Management Strategies**

| **Variable** | **Category** | **Frequency** | **Percent (%)** |
| --- | --- | --- | --- |
| **Primary specialty** | Nephrology | 1 | 0.8 |
|  | Oral & Maxillofacial Surgery (OMFS) | 128 | 99.2 |
| **Co-management teams** | None | 52 | 49.5 |
|  | Endocrinology | 20 | 19.0 |
|  | Plastic Surgery | 17 | 16.2 |
|  | Nephrology | 10 | 9.5 |
|  | CTU/Critical Care | 10 | 9.5 |
|  | Infectious Disease | 2 | 1.9 |
|  | Pediatrics | 1 | 1.0 |
|  | Gastroenterology | 1 | 1.0 |
|  | Hematology | 1 | 1.0 |
|  | Intensivist | 1 | 1.0 |
|  | Neurosurgery | 1 | 1.0 |
|  | ENT | 1 | 1.0 |
|  | Medical Nutritional Therapy Unit | 1 | 1.0 |
|  | Cardiology | 5 | 4.8 |
| **Technique of repair** | Healing by secondary intention | 81 | 70.4 |
|  | Skin grafting | 24 | 20.9 |
|  | Direct closure | 1 | 0.9 |
|  | Planned for local flap | 1 | 0.9 |
|  | None | 8 | 7.0 |
| **Setting of care** | Inpatient | 93 | 73.2 |
|  | Open ward | 21 | 16.5 |
|  | Tertiary | 10 | 7.9 |
|  | ICU | 3 | 2.4 |
| **Mode of anaesthesia** | Local anaesthesia | 118 | 92.2 |
|  | General anaesthesia (GA) | 7 | 5.5 |
|  | GA + LA | 3 | 2.3 |
| **Debridement solution** | Normal saline + povidone iodine | 34 | 27.0 |
|  | Antibiotic-compounded solution (SuperSolution) | 29 | 23.0 |
|  | Eusol variants | 22 | 17.5* |
|  | Honey-based solutions | 18 | 14.3* |
|  | Normal saline alone or combinations | 14 | 11.2* |
|  | Other solutions | 7 | 5.6* |
| **Frequency of debridement** | Once daily | 88 | 69.3 |
|  | Twice daily | 39 | 30.7 |
| **Dressing material** | Gauze | 47 | 37.3 |
|  | Gauze + crepe bandage | 26 | 20.6 |
|  | Sufratulle ± gauze | 20 | 15.8* |
|  | Honey-based dressings | 21 | 16.7* |
|  | Povidone iodine ± honey | 4 | 3.2 |
|  | Dichlohexidine / Eusol A&B | 2 | 1.6 |
| **Nutritional prescription** | High protein diet | 44 | 40.0 |
|  | High protein + high calorie | 34 | 30.9 |
|  | High protein pap | 18 | 16.4 |
|  | Oral diet | 9 | 8.2 |
|  | Intensive breast milk + Complan | 1 | 0.9 |
|  | Parenteral | 1 | 0.9 |
|  | Not available | 3 | 2.7 |

*Grouped combinations for clarity.

Nearly all patients (99.2%) were managed primarily by the OMFS team, with co-management uncommon (49.5% had no additional team). Endocrinology, plastic surgery, nephrology, and critical care were the most frequent co-managing services. Healing by secondary intention predominated (70.4%), followed by skin grafting (20.9%). Inpatient care was the main setting (73.2%), with ICU admission rare (2.4%). Local anaesthesia was used in the majority of procedures (92.2%). Debridement most commonly used normal saline ± povidone iodine (27.0%) or antibiotic-compounded solutions (23.0%) and was performed once daily in 69.3% of patients. Gauze-based dressings predominated, and nutritional management emphasized high-protein diets, alone or combined with high-calorie supplementation.

**Supplemental Table 2B: Empirical Antibiotics Administered on Presentation**

| **Antibiotic Regimen** | **Frequency** | **Percent (%)** |
| --- | --- | --- |
| Combination 1 (Meronem + Metronidazole) | 2 | 1.7 |
| Combination 2 (Meronem + Ceftriaxone) | 1 | 0.8 |
| Combination 3 (Meronem + Dalacin C + Metronidazole + Levofloxacin) | 1 | 0.8 |
| Combination 4 (Meronem + Levofloxacin) | 1 | 0.8 |
| Combination 5 (Dalacin + Metronidazole + Levofloxacin) | 1 | 0.8 |
| Combination 6 (Ceftriaxone + Metronidazole) | 89 | 74.8 |
| Combination 7 (Ceftriaxone + Metronidazole + Levofloxacin) | 2 | 1.7 |
| Combination 8 (Ceftriaxone + Clindamycin) | 4 | 3.4 |
| Combination 9 (Ceftriaxone + Tinidazole) | 3 | 2.5 |
| Combination 10 (Ceftriaxone + Metronidazole + Dalacin) | 3 | 2.5 |
| Combination 11 (Ceftriaxone + Clindamycin + Metronidazole) | 2 | 1.7 |
| Combination 12 (Ceftriaxone + Levofloxacin) | 1 | 0.8 |
| Combination 13 (Bacqure + Metronidazole) | 4 | 3.4 |
| Combination 14 (Bacqure + Metronidazole + Ciprofloxacin) | 1 | 0.8 |
| Combination 15 (Augmentin + Metronidazole) | 1 | 0.8 |
| Combination 16 (Ceftriaxone + Dalacin) | 1 | 0.8 |
| Vancomycin (monotherapy) | 2 | 1.7 |
| **Total** | 119 | 100.0 |

**Summary:**The most frequently prescribed empirical antibiotic regimen was **Ceftriaxone + Metronidazole**, administered to 74.8% of patients. The remaining prescriptions involved various combinations of broad-spectrum antibiotics, reflecting tailored coverage for polymicrobial infections on presentation.

**Supplemental Table 3: Drug Sensitivity Patterns of Microbial Isolates**

| **Sensitivity Code** | **Drug Combination** | **Frequency** | **Percent (%)** |
| --- | --- | --- | --- |
| S1A | Amikacin | 1 | 1.0 |
| S1B | Amoxicillin | 1 | 1.0 |
| S1C | Gentamicin | 1 | 1.0 |
| S1D | Piperacillin | 1 | 1.0 |
| S2A | Amoxiclav + Amikacin | 1 | 1.0 |
| S2B | Augmentin + Streptomycin | 7 | 6.8 |
| S2C | Ceftriaxone + Cefuroxime | 18 | 17.5 |
| S2D | Ceftriaxone + Clindamycin | 12 | 11.7 |
| S2E | Ceftriaxone + Clindamycin | 2 | 1.9 |
| S2F | Clindamycin + Augmentin | 1 | 1.0 |
| S2G | Ciprofloxacin + Cefuroxime | 2 | 1.9 |
| S2H | Gentamicin + Chloramphenicol | 1 | 1.0 |
| S2I | Gentamicin + Ciprofloxacin | 2 | 1.9 |
| S2J | Levofloxacin + Ciprofloxacin | 1 | 1.0 |
| S2K | Meropenem + Levofloxacin | 1 | 1.0 |
| S2J | Piperacillin + Ceftriaxone | 1 | 1.0 |
| S3A | Cefixime + Gentamicin + Erythromycin | 10 | 9.7 |
| S3B | Cefixime + Gentamicin + Levofloxacin | 8 | 7.8 |
| S3C | Ceftriaxone + Ciprofloxacin + Gentamicin | 2 | 1.9 |
| S3D | Ceftriaxone + Amikacin + Imipenem | 2 | 1.9 |
| S3E | Gentamicin + Ceftazidime + Ciprofloxacin | 2 | 1.9 |
| S3F | Meropenem + Levofloxacin + Polymyxin B | 1 | 1.0 |
| S3G | Ofloxacin + Imipenem + Ceftriaxone | 1 | 1.0 |
| S3H | Amoxicillin + Cefepime + Vancomycin | 1 | 1.0 |
| S4A | Amikacin + Levofloxacin + Ceftriaxone + Ofloxacin | 4 | 3.9 |
| S4B | Amikacin + Levofloxacin + Augmentin + Erythromycin | 1 | 1.0 |
| S4C | Amoxiclav + Amikacin + Gentamicin + Clindamycin | 1 | 1.0 |
| S4D | Ceftriaxone + Clindamycin + Imipenem + Gentamicin | 2 | 1.9 |
| S4E | Cefturoxime + Ofloxacin + Imipenem + Ciprofloxacin | 1 | 1.0 |
| S4F | Ciprofloxacin + Ceftriaxone + Imipenem + Ofloxacin | 1 | 1.0 |
| S4G | Ciprofloxacin + Ceftriaxone + Ceftazidime + Amikacin | 2 | 1.9 |
| S4H | Clindamycin + Levofloxacin + Augmentin + Vancomycin | 3 | 2.9 |
| S4I | Clindamycin + Ceftriaxone + Gentamicin + Augmentin | 1 | 1.0 |
| S4J | Erythromycin + Cefuroxime + Gentamicin + Levofloxacin | 2 | 1.9 |
| S4K | Levofloxacin + Meropenem + Amikacin + Ceftriaxone | 1 | 1.0 |
| S5A | Gentamicin + Imipenem + Ceftazidime + Ciprofloxacin + Levofloxacin | 2 | 1.9 |
| S5B | Gentamicin + Meropenem + Levofloxacin + Azithromycin + Cefoxitin | 1 | 1.0 |
| S6 | Cefuroxime + Gentamicin + Ofloxacin + Imipenem + Levofloxacin + Ciprofloxacin | 1 | 1.0 |
| **Total** |  | 103 | 100.0 |

**Key Findings:**

The most frequent sensitivity combinations were:

**S2C:** Ceftriaxone + Cefuroxime (n = 18, 17.5%), **S2D:** Ceftriaxone + Clindamycin (n = 12, 11.7%), **S3A:** Cefixime + Gentamicin + Erythromycin (n = 10, 9.7%), **S3B:** Cefixime + Gentamicin + Levofloxacin (n = 8, 7.8%).

**Supplemental Table 4: Association Between Level of Education and History of Self-Medication/Traditional Medicine Use**

| **Level of Education** | **Both (%)** | **Herbal Concoction (%)** | **No (%)** | **Self-Medication (%)** | **χ² (p-value)** |
| --- | --- | --- | --- | --- | --- |
| No education | 3 (10.3) | 2 (6.9) | 3 (10.3) | 21 (72.4) | 19.96 (0.068) |
| Primary | 7 (14.9) | 5 (10.6) | 7 (14.9) | 28 (59.6) |  |
| Quranic school | 0 (0.0) | 0 (0.0) | 1 (14.3) | 6 (85.7) |  |
| Secondary | 4 (36.4) | 3 (27.3) | 2 (18.2) | 2 (18.2) |  |
| Tertiary | 1 (11.1) | 1 (11.1) | 4 (44.4) | 3 (33.3) |  |
| **Total** | 15 (14.6) | 11 (10.7) | 17 (16.5) | 60 (58.3) |  |

**Supplemental Table 5: Relationship Between Age Group and Extent of Spread of Necrotizing Fasciitis**

| **Extent of Spread** | **Youth (%)** | **Young Adult (%)** | **Very Elderly (%)** | **Middle Aged (%)** | **Infant (%)** | **Elderly (%)** | **Adolescent (%)** | **χ² (p-value)** |
| --- | --- | --- | --- | --- | --- | --- | --- | --- |
| Sublingual | 1 (5.0) | 8 (40.0) | 0 (0.0) | 6 (30.0) | 0 (0.0) | 5 (25.0) | 0 (0.0) | 320.128 (0.000*) |
| Lateral Neck | 0 (0.0) | 1 (33.3) | 0 (0.0) | 2 (66.7) | 0 (0.0) | 0 (0.0) | 0 (0.0) |  |
| Anterior Chest | 1 (2.8) | 8 (22.2) | 3 (8.3) | 7 (19.4) | 0 (0.0) | 16 (44.4) | 1 (2.8) |  |
| Submasseteric | 0 (0.0) | 0 (0.0) | 1 (16.7) | 2 (33.3) | 0 (0.0) | 3 (50.0) | 0 (0.0) |  |
| Canine | 0 (0.0) | 0 (0.0) | 1 (25.0) | 3 (75.0) | 0 (0.0) | 0 (0.0) | 0 (0.0) |  |
| Supraclavicular | 0 (0.0) | 0 (0.0) | 1 (100.0) | 0 (0.0) | 0 (0.0) | 0 (0.0) | 0 (0.0) |  |
| Pterygomandibular | 0 (0.0) | 0 (0.0) | 0 (0.0) | 1 (100.0) | 0 (0.0) | 0 (0.0) | 0 (0.0) |  |
| Upper Neck | 0 (0.0) | 0 (0.0) | 0 (0.0) | 0 (0.0) | 0 (0.0) | 1 (100.0) | 0 (0.0) |  |
| Infratemporal | 0 (0.0) | 0 (0.0) | 0 (0.0) | 1 (100.0) | 0 (0.0) | 0 (0.0) | 0 (0.0) |  |
| Masseteric | 0 (0.0) | 0 (0.0) | 0 (0.0) | 0 (0.0) | 0 (0.0) | 1 (100.0) | 0 (0.0) |  |
| Anterior Mediastinum | 0 (0.0) | 0 (0.0) | 0 (0.0) | 0 (0.0) | 0 (0.0) | 1 (100.0) | 0 (0.0) |  |
| Parotid | 0 (0.0) | 0 (0.0) | 0 (0.0) | 0 (0.0) | 1 (100.0) | 0 (0.0) | 0 (0.0) |  |
| Cranium | 0 (0.0) | 0 (0.0) | 0 (0.0) | 0 (0.0) | 1 (100.0) | 0 (0.0) | 0 (0.0) |  |
| Temporal | 0 (0.0) | 0 (0.0) | 1 (20.0) | 1 (20.0) | 0 (0.0) | 3 (60.0) | 0 (0.0) |  |
| Anterior Neck | 0 (0.0) | 10 (50.0) | 2 (10.0) | 4 (20.0) | 0 (0.0) | 3 (15.0) | 1 (5.0) |  |
| Face | 0 (0.0) | 1 (11.1) | 1 (11.1) | 3 (33.3) | 0 (0.0) | 4 (44.4) | 0 (0.0) |  |
| Buccal | 0 (0.0) | 2 (11.8) | 4 (23.5) | 4 (23.5) | 1 (5.9) | 6 (35.3) | 0 (0.0) |  |
| Submental | 1 (2.3) | 16 (36.4) | 5 (11.4) | 11 (25.0) | 0 (0.0) | 10 (22.7) | 1 (2.3) |  |
| Submandibular | 2 (2.7) | 20 (27.4) | 10 (13.7) | 20 (27.4) | 1 (1.4) | 19 (26.0) | 1 (1.4) |  |

*p-value < 0.05 indicates statistical significance

**Legends:**

**Supplemental Table 1. Clinical Presentation of Patients**Distribution of clinical features among patients, including extent of fascial spread, most frequently involved teeth, overlying skin discoloration, history of self-medication or traditional remedies, areas of necrosis, comorbidities, and microbial isolates. Values are presented as frequencies and percentages.

**Supplemental Table 2A. Management Strategies**Summary of patient management approaches, including primary specialty, co-management teams, surgical technique, care setting, anesthesia modality, debridement solutions and frequency, dressing materials, and nutritional prescriptions. Nearly all patients were primarily managed by the OMFS team, with secondary intention healing and local anesthesia predominating.

**Supplemental Table 2B. Empirical Antibiotics Administered on Presentation**Frequencies and percentages of empirical antibiotic regimens used at presentation. Ceftriaxone + Metronidazole was the most commonly prescribed combination (74.8%), with other regimens reflecting tailored coverage for polymicrobial infections.

**Supplemental Table 3. Drug Sensitivity Patterns of Microbial Isolates**Distribution of sensitivity patterns among microbial isolates from patients. The most frequently observed combinations were Ceftriaxone + Cefuroxime (17.5%), Ceftriaxone + Clindamycin (11.7%), Cefixime + Gentamicin + Erythromycin (9.7%), and Cefixime + Gentamicin + Levofloxacin (7.8%).

**Supplemental Table 4. Association Between Level of Education and History of Self-Medication/Traditional Medicine Use**Analysis of the relationship between participants’ education level and self-reported use of self-medication or traditional remedies. Frequencies and percentages are presented, with χ² testing for statistical significance.

**Supplemental Table 5. Relationship Between Age Group and Extent of Spread of Necrotizing Fasciitis**Comparison of fascial spread across age categories, with χ² test assessing statistical significance. The distribution of disease extent varied significantly by age group (*p < 0.05).
